# Supplementary material for: Portosystemic Hepatic Encephalopathy Scores (PHES) differ between Danish and German healthy populations despite their geographical and cultural similarities
Source: PubMed Central journal article supplement (PMC11349773; doi:10.1007/s11011-024-01380-1), 2024-07-17

a)

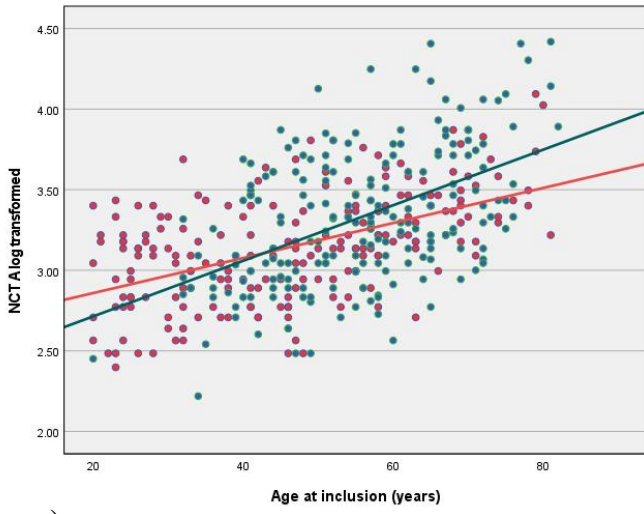

b)

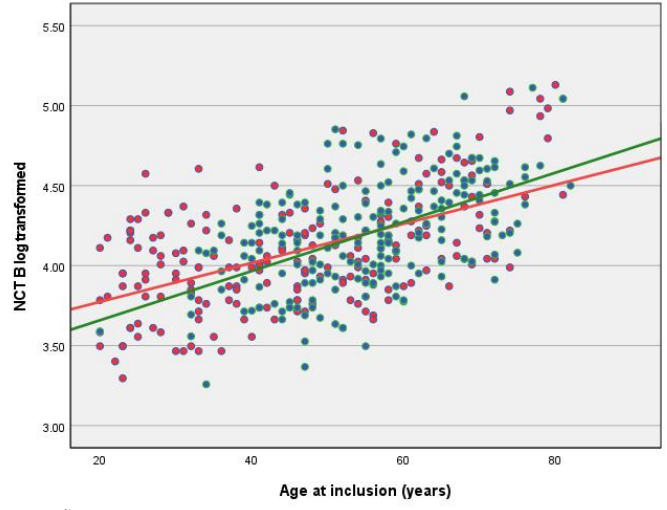

c)

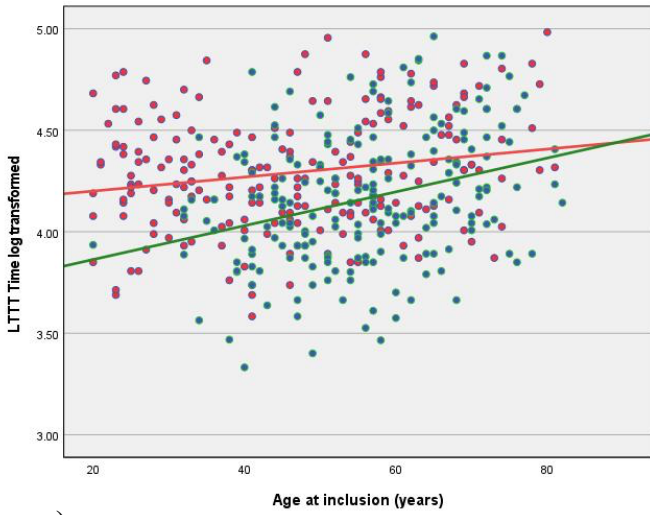

d)

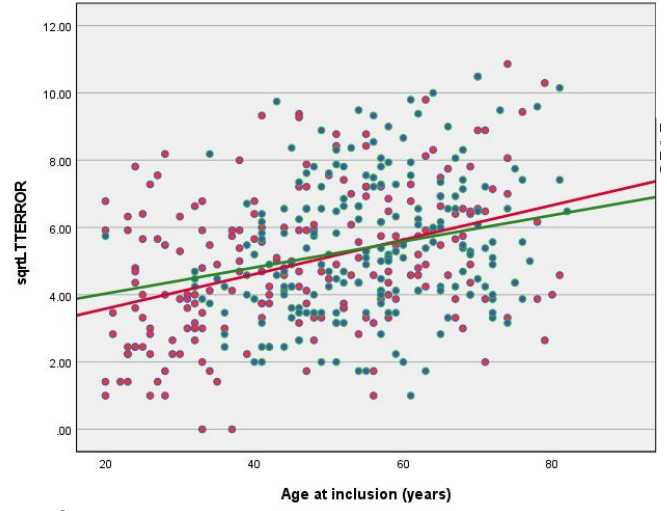

e)

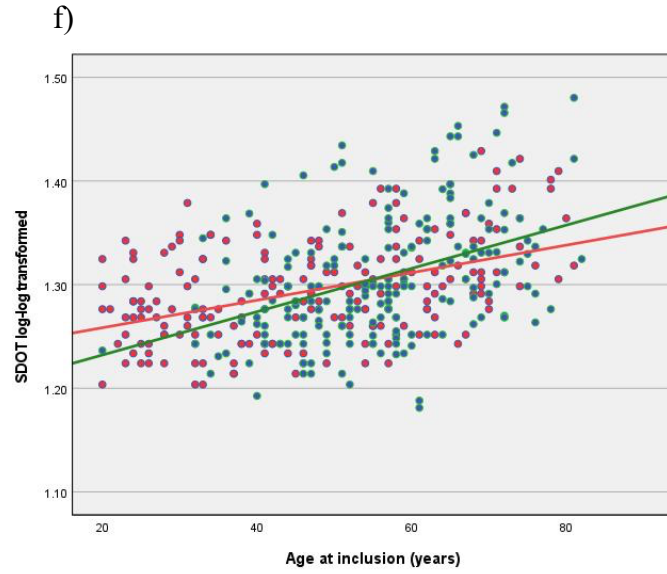

Supplement: 11011_2024_1380_MOESM1_ESM.pdf [file 11011_2024_1380_MOESM1_ESM.pdf]
