# Supplementary material for: Portosystemic Hepatic Encephalopathy Scores (PHES) differ between Danish and German healthy populations despite their geographical and cultural similarities
Source: PubMed Central journal article supplement (PMC11349773; doi:10.1007/s11011-024-01380-1), 2024-07-17

Supplementary Figure 2:

Distributional plots for a) NCTA, b) NCTB, c) LTT time, d) LTT errors, e) DST, and f) SDT in German (top) and Danish (bottom) patients.

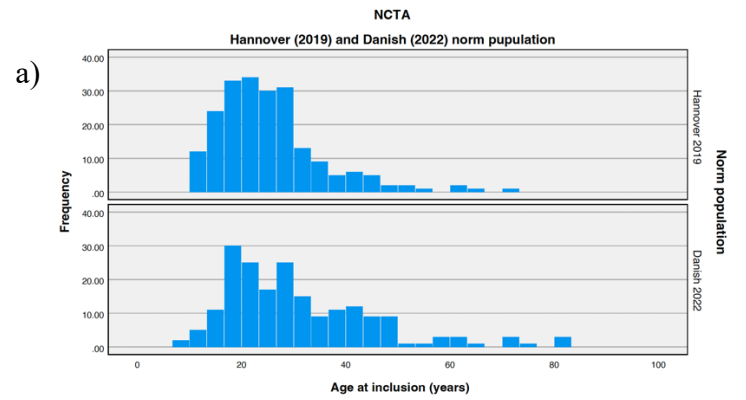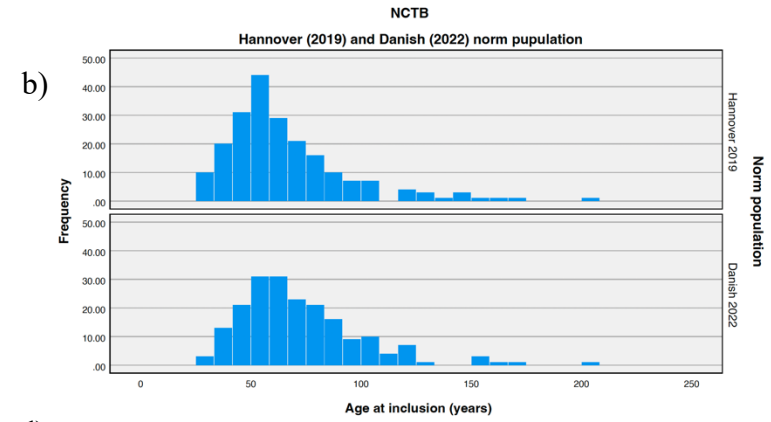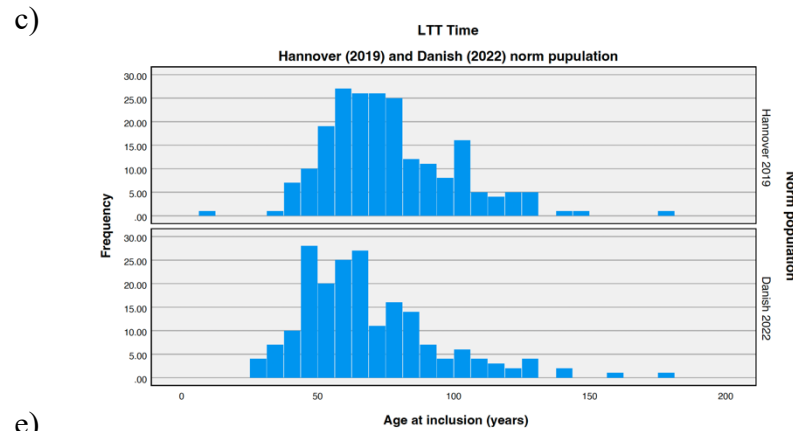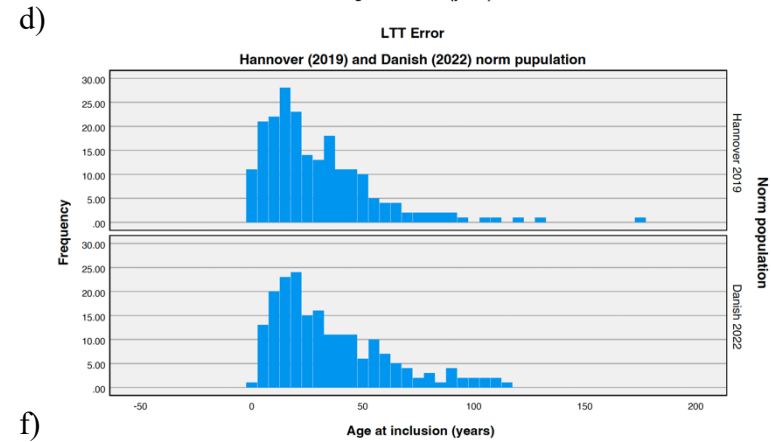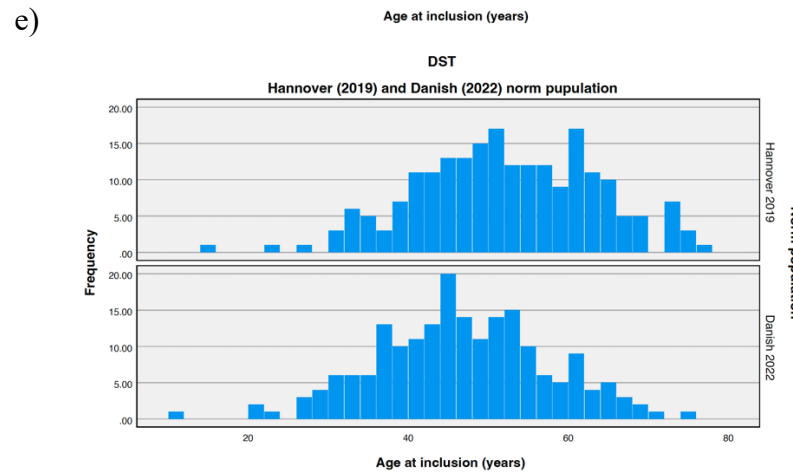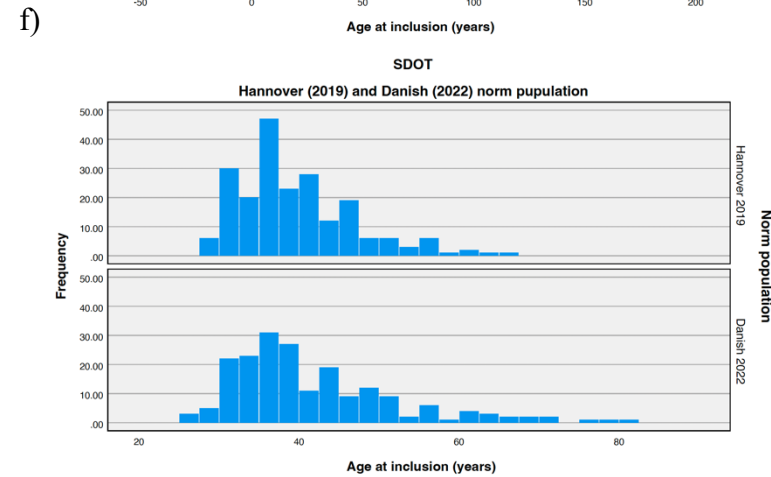

Supplement: 11011_2024_1380_MOESM2_ESM.pdf [file 11011_2024_1380_MOESM2_ESM.pdf]
