# Supplementary material for: Portosystemic Hepatic Encephalopathy Scores (PHES) differ between Danish and German healthy populations despite their geographical and cultural similarities
Source: PubMed Central journal article supplement (PMC11349773; doi:10.1007/s11011-024-01380-1), 2024-07-17
Supplement: 11011_2024_1380_MOESM3_ESM.pdf [file 11011_2024_1380_MOESM3_ESM.pdf]

## Supplementary Table 1

NCTA Norm PSE Danish Data 2021, by Age and Covariables

| Gender     | age | NCTA: mean<br>-1 sd, by<br>age | NCTA: mean<br>by age | NCTA: mean<br>+ 1 sd, by<br>age | NCTA: mean<br>+ 2 sd, by<br>age | NCTA: mean<br>+ 3 sd, by<br>age |
|------------|-----|--------------------------------|----------------------|---------------------------------|---------------------------------|---------------------------------|
| Male       |     |                                |                      |                                 |                                 |                                 |
| Formal     |     |                                |                      |                                 |                                 |                                 |
| Education: |     |                                |                      |                                 |                                 |                                 |
| 7-12 years | 30  | 15                             | 22                   | 32                              | 47                              | 68                              |
|            | 31  | 15                             | 22                   | 33                              | 48                              | 69                              |
|            | 32  | 15                             | 23                   | 33                              | 48                              | 70                              |
|            | 33  | 15                             | 23                   | 34                              | 49                              | 71                              |
|            | 34  | 16                             | 23                   | 34                              | 50                              | 72                              |
|            | 35  | 16                             | 24                   | 35                              | 51                              | 73                              |
|            | 36  | 16                             | 24                   | 35                              | 51                              | 74                              |
|            | 37  | 16                             | 24                   | 36                              | 52                              | 75                              |
|            | 38  | 17                             | 25                   | 37                              | 53                              | 77                              |
|            | 39  | 17                             | 25                   | 37                              | 54                              | 78                              |
|            | 40  | 17                             | 26                   | 38                              | 55                              | 79                              |
|            | 41  | 17                             | 26                   | 38                              | 55                              | 80                              |
|            | 42  | 18                             | 26                   | 39                              | 56                              | 81                              |
|            | 43  | 18                             | 27                   | 39                              | 57                              | 83                              |
|            | 44  | 18                             | 27                   | 40                              | 58                              | 84                              |
|            | 45  | 19                             | 28                   | 41                              | 59                              | 85                              |
|            | 46  | 19                             | 28                   | 41                              | 60                              | 87                              |
|            | 47  | 19                             | 29                   | 42                              | 61                              | 88                              |
|            | 48  | 19                             | 29                   | 43                              | 62                              | 89                              |
|            | 49  | 20                             | 29                   | 43                              | 63                              | 91                              |
|            | 50  | 20                             | 30                   | 44                              | 64                              | 92                              |
|            | 51  | 20                             | 30                   | 45                              | 65                              | 93                              |
|            | 52  | 21                             | 31                   | 45                              | 66                              | 95                              |
|            | 53  | 21                             | 31                   | 46                              | 67                              | 96                              |
|            | 54  | 21                             | 32                   | 47                              | 68                              | 98                              |
|            | 55  | 22                             | 32                   | 47                              | 69                              | 99                              |
|            | 56  | 22                             | 33                   | 48                              | 70                              | 101                             |
|            | 57  | 22                             | 33                   | 49                              | 71                              | 102                             |
|            | 58  | 23                             | 34                   | 50                              | 72                              | 104                             |
|            | 59  | 23                             | 34                   | 50                              | 73                              | 106                             |
|            | 60  | 24                             | 35                   | 51                              | 74                              | 107                             |
|            | 61  | 24                             | 35                   | 52                              | 75                              | 109                             |
|            | 62  | 24                             | 36                   | 53                              | 76                              | 111                             |
|            | 63  | 25                             | 37                   | 54                              | 78                              | 112                             |
|            | 64  | 25                             | 37                   | 54                              | 79                              | 114                             |
|            | 65  | 25                             | 38                   | 55                              | 80                              | 116                             |
|            | 66  | 26                             | 38                   | 56                              | 81                              | 118                             |
|            | 67  | 26                             | 39                   | 57                              | 82                              | 119                             |
|            | 68  | 27                             | 39                   | 58                              | 84                              | 121                             |
|            | 69  | 27                             | 40                   | 59                              | 85                              | 123                             |
|            | 70  | 28                             | 41                   | 60                              | 86                              | 125                             |
|            | 71  | 28                             | 41                   | 61                              | 88                              | 127                             |
|            | 72  | 28                             | 42                   | 61                              | 89                              | 129                             |
|            | 73  | 29                             | 43                   | 62                              | 90                              | 131                             |
|            | 74  | 29                             | 43                   | 63                              | 92                              | 133                             |
|            | 75  | 30                             | 44                   | 64                              | 93                              | 135                             |
|            | 76  | 30                             | 45                   | 65                              | 95                              | 137                             |
|            | 77  | 31                             | 45                   | 66                              | 96                              | 139                             |
|            | 78  | 31                             | 46                   | 67                              | 98                              | 141                             |
|            | 79  | 32                             | 47                   | 68                              | 99                              | 144                             |
|            | 80  | 32                             | 47                   | 69                              | 101                             | 146                             |
|            | 81  | 33                             | 48                   | 71                              | 102                             | 148                             |
|            | 82  | 33                             | 49                   | 72                              | 104                             | 150                             |

Male

Formal  
Education:  
13 - 19  
years

|    |    |    |    |    |     |
|----|----|----|----|----|-----|
| 30 | 12 | 18 | 26 | 38 | 55  |
| 31 | 12 | 18 | 27 | 38 | 56  |
| 32 | 12 | 18 | 27 | 39 | 56  |
| 33 | 12 | 19 | 27 | 40 | 57  |
| 34 | 12 | 19 | 28 | 40 | 58  |
| 35 | 13 | 19 | 28 | 41 | 59  |
| 36 | 13 | 19 | 29 | 41 | 60  |
| 37 | 13 | 20 | 29 | 42 | 61  |
| 38 | 13 | 20 | 30 | 43 | 62  |
| 39 | 14 | 20 | 30 | 43 | 63  |
| 40 | 14 | 21 | 31 | 44 | 64  |
| 41 | 14 | 21 | 31 | 45 | 65  |
| 42 | 14 | 21 | 31 | 45 | 66  |
| 43 | 14 | 22 | 32 | 46 | 67  |
| 44 | 15 | 22 | 32 | 47 | 68  |
| 45 | 15 | 22 | 33 | 48 | 69  |
| 46 | 15 | 23 | 33 | 48 | 70  |
| 47 | 15 | 23 | 34 | 49 | 71  |
| 48 | 16 | 23 | 34 | 50 | 72  |
| 49 | 16 | 24 | 35 | 51 | 73  |
| 50 | 16 | 24 | 36 | 51 | 74  |
| 51 | 16 | 24 | 36 | 52 | 76  |
| 52 | 17 | 25 | 37 | 53 | 77  |
| 53 | 17 | 25 | 37 | 54 | 78  |
| 54 | 17 | 26 | 38 | 55 | 79  |
| 55 | 17 | 26 | 38 | 55 | 80  |
| 56 | 18 | 26 | 39 | 56 | 82  |
| 57 | 18 | 27 | 40 | 57 | 83  |
| 58 | 18 | 27 | 40 | 58 | 84  |
| 59 | 19 | 28 | 41 | 59 | 85  |
| 60 | 19 | 28 | 41 | 60 | 87  |
| 61 | 19 | 29 | 42 | 61 | 88  |
| 62 | 19 | 29 | 43 | 62 | 89  |
| 63 | 20 | 29 | 43 | 63 | 91  |
| 64 | 20 | 30 | 44 | 64 | 92  |
| 65 | 20 | 30 | 45 | 65 | 94  |
| 66 | 21 | 31 | 45 | 66 | 95  |
| 67 | 21 | 31 | 46 | 67 | 97  |
| 68 | 21 | 32 | 47 | 68 | 98  |
| 69 | 22 | 32 | 47 | 69 | 100 |
| 70 | 22 | 33 | 48 | 70 | 101 |
| 71 | 22 | 33 | 49 | 71 | 103 |
| 72 | 23 | 34 | 50 | 72 | 104 |
| 73 | 23 | 34 | 50 | 73 | 106 |
| 74 | 24 | 35 | 51 | 74 | 107 |
| 75 | 24 | 35 | 52 | 75 | 109 |
| 76 | 24 | 36 | 53 | 76 | 111 |
| 77 | 25 | 37 | 54 | 78 | 113 |
| 78 | 25 | 37 | 54 | 79 | 114 |
| 79 | 25 | 38 | 55 | 80 | 116 |
| 80 | 26 | 38 | 56 | 81 | 118 |
| 81 | 26 | 39 | 57 | 83 | 120 |
| 82 | 27 | 40 | 58 | 84 | 122 |

Female  
Formal  
Education:  
7-12 years

|    |    |    |    |    |    |
|----|----|----|----|----|----|
| 30 | 13 | 19 | 29 | 41 | 60 |
| 31 | 13 | 20 | 29 | 42 | 61 |
| 32 | 13 | 20 | 30 | 43 | 62 |
| 33 | 14 | 20 | 30 | 43 | 63 |
| 34 | 14 | 21 | 31 | 44 | 64 |
| 35 | 14 | 21 | 31 | 45 | 65 |
| 36 | 14 | 21 | 31 | 45 | 66 |
| 37 | 14 | 22 | 32 | 46 | 67 |

|    |    |    |    |    |     |
|----|----|----|----|----|-----|
| 38 | 15 | 22 | 32 | 47 | 68  |
| 39 | 15 | 22 | 33 | 48 | 69  |
| 40 | 15 | 23 | 33 | 48 | 70  |
| 41 | 15 | 23 | 34 | 49 | 71  |
| 42 | 16 | 23 | 34 | 50 | 72  |
| 43 | 16 | 24 | 35 | 51 | 73  |
| 44 | 16 | 24 | 36 | 51 | 74  |
| 45 | 16 | 24 | 36 | 52 | 75  |
| 46 | 17 | 25 | 37 | 53 | 77  |
| 47 | 17 | 25 | 37 | 54 | 78  |
| 48 | 17 | 26 | 38 | 55 | 79  |
| 49 | 17 | 26 | 38 | 55 | 80  |
| 50 | 18 | 26 | 39 | 56 | 81  |
| 51 | 18 | 27 | 40 | 57 | 83  |
| 52 | 18 | 27 | 40 | 58 | 84  |
| 53 | 19 | 28 | 41 | 59 | 85  |
| 54 | 19 | 28 | 41 | 60 | 87  |
| 55 | 19 | 29 | 42 | 61 | 88  |
| 56 | 19 | 29 | 43 | 62 | 89  |
| 57 | 20 | 29 | 43 | 63 | 91  |
| 58 | 20 | 30 | 44 | 64 | 92  |
| 59 | 20 | 30 | 45 | 65 | 94  |
| 60 | 21 | 31 | 45 | 66 | 95  |
| 61 | 21 | 31 | 46 | 67 | 96  |
| 62 | 21 | 32 | 47 | 68 | 98  |
| 63 | 22 | 32 | 47 | 69 | 99  |
| 64 | 22 | 33 | 48 | 70 | 101 |
| 65 | 22 | 33 | 49 | 71 | 103 |
| 66 | 23 | 34 | 50 | 72 | 104 |
| 67 | 23 | 34 | 50 | 73 | 106 |
| 68 | 24 | 35 | 51 | 74 | 107 |
| 69 | 24 | 35 | 52 | 75 | 109 |
| 70 | 24 | 36 | 53 | 76 | 111 |
| 71 | 25 | 37 | 54 | 78 | 112 |
| 72 | 25 | 37 | 54 | 79 | 114 |
| 73 | 25 | 38 | 55 | 80 | 116 |
| 74 | 26 | 38 | 56 | 81 | 118 |
| 75 | 26 | 39 | 57 | 83 | 120 |
| 76 | 27 | 39 | 58 | 84 | 121 |
| 77 | 27 | 40 | 59 | 85 | 123 |
| 78 | 28 | 41 | 60 | 86 | 125 |
| 79 | 28 | 41 | 61 | 88 | 127 |
| 80 | 28 | 42 | 61 | 89 | 129 |
| 81 | 29 | 43 | 62 | 90 | 131 |
| 82 | 29 | 43 | 63 | 92 | 133 |

Female  
Formal  
Education:  
13 - 19  
years

|    |    |    |    |    |    |
|----|----|----|----|----|----|
| 30 | 10 | 16 | 23 | 34 | 49 |
| 31 | 10 | 16 | 24 | 34 | 49 |
| 32 | 11 | 16 | 24 | 35 | 50 |
| 33 | 11 | 16 | 24 | 35 | 51 |
| 34 | 11 | 17 | 25 | 36 | 52 |
| 35 | 11 | 17 | 25 | 36 | 52 |
| 36 | 11 | 17 | 25 | 37 | 53 |
| 37 | 12 | 17 | 26 | 37 | 54 |
| 38 | 12 | 18 | 26 | 38 | 55 |
| 39 | 12 | 18 | 27 | 38 | 56 |
| 40 | 12 | 18 | 27 | 39 | 57 |
| 41 | 12 | 19 | 27 | 40 | 57 |
| 42 | 12 | 19 | 28 | 40 | 58 |
| 43 | 13 | 19 | 28 | 41 | 59 |
| 44 | 13 | 19 | 29 | 42 | 60 |
| 45 | 13 | 20 | 29 | 42 | 61 |
| 46 | 13 | 20 | 30 | 43 | 62 |
| 47 | 14 | 20 | 30 | 43 | 63 |

|    |    |    |    |    |     |
|----|----|----|----|----|-----|
| 48 | 14 | 21 | 31 | 44 | 64  |
| 49 | 14 | 21 | 31 | 45 | 65  |
| 50 | 14 | 21 | 31 | 46 | 66  |
| 51 | 14 | 22 | 32 | 46 | 67  |
| 52 | 15 | 22 | 32 | 47 | 68  |
| 53 | 15 | 22 | 33 | 48 | 69  |
| 54 | 15 | 23 | 33 | 48 | 70  |
| 55 | 15 | 23 | 34 | 49 | 71  |
| 56 | 16 | 23 | 34 | 50 | 72  |
| 57 | 16 | 24 | 35 | 51 | 73  |
| 58 | 16 | 24 | 36 | 51 | 74  |
| 59 | 16 | 25 | 36 | 52 | 76  |
| 60 | 17 | 25 | 37 | 53 | 77  |
| 61 | 17 | 25 | 37 | 54 | 78  |
| 62 | 17 | 26 | 38 | 55 | 79  |
| 63 | 17 | 26 | 38 | 56 | 80  |
| 64 | 18 | 26 | 39 | 56 | 82  |
| 65 | 18 | 27 | 40 | 57 | 83  |
| 66 | 18 | 27 | 40 | 58 | 84  |
| 67 | 19 | 28 | 41 | 59 | 85  |
| 68 | 19 | 28 | 41 | 60 | 87  |
| 69 | 19 | 29 | 42 | 61 | 88  |
| 70 | 20 | 29 | 43 | 62 | 89  |
| 71 | 20 | 30 | 43 | 63 | 91  |
| 72 | 20 | 30 | 44 | 64 | 92  |
| 73 | 20 | 30 | 45 | 65 | 94  |
| 74 | 21 | 31 | 45 | 66 | 95  |
| 75 | 21 | 31 | 46 | 67 | 97  |
| 76 | 21 | 32 | 47 | 68 | 98  |
| 77 | 22 | 32 | 47 | 69 | 100 |
| 78 | 22 | 33 | 48 | 70 | 101 |
| 79 | 22 | 33 | 49 | 71 | 103 |
| 80 | 23 | 34 | 50 | 72 | 104 |
| 81 | 23 | 34 | 50 | 73 | 106 |
| 82 | 24 | 35 | 51 | 74 | 108 |

NCT B Norm PSE Danish Data 2021, by Age and Covariables

| Gender     | age | NCTB: mean<br>-1 sd, by<br>age | NCTB: mean<br>by age | NCTB: mean<br>+ 1 sd, by<br>age | NCTB: mean<br>+ 2 sd, by<br>age | NCTB: mean<br>+ 3 sd, by<br>age |
|------------|-----|--------------------------------|----------------------|---------------------------------|---------------------------------|---------------------------------|
| Male       |     |                                |                      |                                 |                                 |                                 |
| Formal     |     |                                |                      |                                 |                                 |                                 |
| Education: |     |                                |                      |                                 |                                 |                                 |
| 7-12 years | 30  | 42                             | 56                   | 74                              | 97                              | 126                             |
|            | 31  | 43                             | 56                   | 75                              | 98                              | 127                             |
|            | 32  | 43                             | 57                   | 76                              | 99                              | 129                             |
|            | 33  | 44                             | 58                   | 77                              | 100                             | 131                             |
|            | 34  | 45                             | 59                   | 78                              | 102                             | 132                             |
|            | 35  | 45                             | 60                   | 79                              | 103                             | 134                             |
|            | 36  | 46                             | 60                   | 80                              | 105                             | 136                             |
|            | 37  | 46                             | 61                   | 81                              | 106                             | 138                             |
|            | 38  | 47                             | 62                   | 83                              | 107                             | 140                             |
|            | 39  | 48                             | 63                   | 84                              | 109                             | 142                             |
|            | 40  | 48                             | 64                   | 85                              | 110                             | 144                             |
|            | 41  | 49                             | 65                   | 86                              | 112                             | 145                             |
|            | 42  | 50                             | 66                   | 87                              | 113                             | 147                             |
|            | 43  | 50                             | 66                   | 88                              | 115                             | 149                             |
|            | 44  | 51                             | 67                   | 89                              | 116                             | 151                             |

|    |    |     |     |     |     |
|----|----|-----|-----|-----|-----|
| 45 | 52 | 68  | 91  | 118 | 153 |
| 46 | 53 | 69  | 92  | 119 | 156 |
| 47 | 53 | 70  | 93  | 121 | 158 |
| 48 | 54 | 71  | 94  | 123 | 160 |
| 49 | 55 | 72  | 96  | 124 | 162 |
| 50 | 55 | 73  | 97  | 126 | 164 |
| 51 | 56 | 74  | 98  | 128 | 166 |
| 52 | 57 | 75  | 99  | 129 | 169 |
| 53 | 58 | 76  | 101 | 131 | 171 |
| 54 | 59 | 77  | 102 | 133 | 173 |
| 55 | 59 | 78  | 104 | 135 | 175 |
| 56 | 60 | 79  | 105 | 137 | 178 |
| 57 | 61 | 80  | 106 | 138 | 180 |
| 58 | 62 | 81  | 108 | 140 | 183 |
| 59 | 63 | 83  | 109 | 142 | 185 |
| 60 | 64 | 84  | 111 | 144 | 188 |
| 61 | 64 | 85  | 112 | 146 | 190 |
| 62 | 65 | 86  | 114 | 148 | 193 |
| 63 | 66 | 87  | 115 | 150 | 195 |
| 64 | 67 | 88  | 117 | 152 | 198 |
| 65 | 68 | 89  | 118 | 154 | 201 |
| 66 | 69 | 91  | 120 | 156 | 203 |
| 67 | 70 | 92  | 122 | 158 | 206 |
| 68 | 71 | 93  | 123 | 160 | 209 |
| 69 | 72 | 94  | 125 | 163 | 212 |
| 70 | 73 | 96  | 127 | 165 | 215 |
| 71 | 74 | 97  | 128 | 167 | 218 |
| 72 | 75 | 98  | 130 | 169 | 220 |
| 73 | 76 | 100 | 132 | 171 | 223 |
| 74 | 77 | 101 | 133 | 174 | 226 |
| 75 | 78 | 102 | 135 | 176 | 230 |
| 76 | 79 | 104 | 137 | 179 | 233 |
| 77 | 80 | 105 | 139 | 181 | 236 |
| 78 | 81 | 107 | 141 | 183 | 239 |
| 79 | 82 | 108 | 143 | 186 | 242 |
| 80 | 83 | 110 | 145 | 188 | 245 |
| 81 | 85 | 111 | 147 | 191 | 249 |
| 82 | 86 | 113 | 149 | 193 | 252 |

Male  
Formal  
Education:  
13 - 19  
years

|    |    |    |    |     |     |
|----|----|----|----|-----|-----|
| 30 | 34 | 45 | 60 | 77  | 101 |
| 31 | 34 | 45 | 60 | 78  | 102 |
| 32 | 35 | 46 | 61 | 79  | 103 |
| 33 | 35 | 46 | 62 | 81  | 105 |
| 34 | 35 | 47 | 63 | 82  | 106 |
| 35 | 36 | 48 | 64 | 83  | 107 |
| 36 | 36 | 48 | 65 | 84  | 109 |
| 37 | 37 | 49 | 65 | 85  | 110 |
| 38 | 37 | 50 | 66 | 86  | 112 |
| 39 | 38 | 50 | 67 | 87  | 113 |
| 40 | 39 | 51 | 68 | 88  | 115 |
| 41 | 39 | 52 | 69 | 90  | 116 |
| 42 | 40 | 52 | 70 | 91  | 118 |
| 43 | 40 | 53 | 71 | 92  | 120 |
| 44 | 41 | 54 | 72 | 93  | 121 |
| 45 | 41 | 55 | 73 | 94  | 123 |
| 46 | 42 | 55 | 74 | 96  | 125 |
| 47 | 42 | 56 | 75 | 97  | 126 |
| 48 | 43 | 57 | 76 | 98  | 128 |
| 49 | 44 | 58 | 77 | 100 | 130 |
| 50 | 44 | 58 | 78 | 101 | 131 |
| 51 | 45 | 59 | 79 | 102 | 133 |
| 52 | 45 | 60 | 80 | 104 | 135 |
| 53 | 46 | 61 | 81 | 105 | 137 |
| 54 | 47 | 62 | 82 | 106 | 139 |

|    |    |    |     |     |     |
|----|----|----|-----|-----|-----|
| 55 | 47 | 62 | 83  | 108 | 140 |
| 56 | 48 | 63 | 84  | 109 | 142 |
| 57 | 49 | 64 | 85  | 111 | 144 |
| 58 | 49 | 65 | 86  | 112 | 146 |
| 59 | 50 | 66 | 88  | 114 | 148 |
| 60 | 51 | 67 | 89  | 115 | 150 |
| 61 | 51 | 68 | 90  | 117 | 152 |
| 62 | 52 | 69 | 91  | 118 | 154 |
| 63 | 53 | 70 | 92  | 120 | 156 |
| 64 | 54 | 71 | 94  | 122 | 158 |
| 65 | 54 | 71 | 95  | 123 | 161 |
| 66 | 55 | 72 | 96  | 125 | 163 |
| 67 | 56 | 73 | 97  | 127 | 165 |
| 68 | 57 | 74 | 99  | 128 | 167 |
| 69 | 57 | 75 | 100 | 130 | 169 |
| 70 | 58 | 76 | 101 | 132 | 172 |
| 71 | 59 | 78 | 103 | 134 | 174 |
| 72 | 60 | 79 | 104 | 135 | 176 |
| 73 | 61 | 80 | 105 | 137 | 179 |
| 74 | 61 | 81 | 107 | 139 | 181 |
| 75 | 62 | 82 | 108 | 141 | 184 |
| 76 | 63 | 83 | 110 | 143 | 186 |
| 77 | 64 | 84 | 111 | 145 | 189 |
| 78 | 65 | 85 | 113 | 147 | 191 |
| 79 | 66 | 86 | 114 | 149 | 194 |
| 80 | 67 | 88 | 116 | 151 | 196 |
| 81 | 67 | 89 | 117 | 153 | 199 |
| 82 | 68 | 90 | 119 | 155 | 202 |

Female  
Formal  
Education:  
7-12 years

|    |    |    |     |     |     |
|----|----|----|-----|-----|-----|
| 30 | 37 | 49 | 65  | 85  | 110 |
| 31 | 38 | 50 | 66  | 86  | 112 |
| 32 | 38 | 50 | 67  | 87  | 113 |
| 33 | 39 | 51 | 68  | 88  | 115 |
| 34 | 39 | 52 | 69  | 90  | 117 |
| 35 | 40 | 52 | 70  | 91  | 118 |
| 36 | 40 | 53 | 71  | 92  | 120 |
| 37 | 41 | 54 | 72  | 93  | 121 |
| 38 | 41 | 55 | 73  | 95  | 123 |
| 39 | 42 | 55 | 74  | 96  | 125 |
| 40 | 42 | 56 | 75  | 97  | 126 |
| 41 | 43 | 57 | 76  | 98  | 128 |
| 42 | 44 | 58 | 77  | 100 | 130 |
| 43 | 44 | 58 | 78  | 101 | 131 |
| 44 | 45 | 59 | 79  | 102 | 133 |
| 45 | 45 | 60 | 80  | 104 | 135 |
| 46 | 46 | 61 | 81  | 105 | 137 |
| 47 | 47 | 62 | 82  | 107 | 139 |
| 48 | 47 | 62 | 83  | 108 | 141 |
| 49 | 48 | 63 | 84  | 109 | 142 |
| 50 | 49 | 64 | 85  | 111 | 144 |
| 51 | 49 | 65 | 86  | 112 | 146 |
| 52 | 50 | 66 | 88  | 114 | 148 |
| 53 | 51 | 67 | 89  | 115 | 150 |
| 54 | 51 | 68 | 90  | 117 | 152 |
| 55 | 52 | 69 | 91  | 119 | 154 |
| 56 | 53 | 70 | 92  | 120 | 156 |
| 57 | 54 | 71 | 94  | 122 | 159 |
| 58 | 54 | 72 | 95  | 123 | 161 |
| 59 | 55 | 73 | 96  | 125 | 163 |
| 60 | 56 | 73 | 97  | 127 | 165 |
| 61 | 57 | 74 | 99  | 128 | 167 |
| 62 | 57 | 76 | 100 | 130 | 170 |
| 63 | 58 | 77 | 101 | 132 | 172 |
| 64 | 59 | 78 | 103 | 134 | 174 |
| 65 | 60 | 79 | 104 | 136 | 177 |

|    |    |    |     |     |     |
|----|----|----|-----|-----|-----|
| 66 | 61 | 80 | 106 | 137 | 179 |
| 67 | 61 | 81 | 107 | 139 | 181 |
| 68 | 62 | 82 | 108 | 141 | 184 |
| 69 | 63 | 83 | 110 | 143 | 186 |
| 70 | 64 | 84 | 111 | 145 | 189 |
| 71 | 65 | 85 | 113 | 147 | 191 |
| 72 | 66 | 86 | 114 | 149 | 194 |
| 73 | 67 | 88 | 116 | 151 | 197 |
| 74 | 68 | 89 | 117 | 153 | 199 |
| 75 | 68 | 90 | 119 | 155 | 202 |
| 76 | 69 | 91 | 121 | 157 | 205 |
| 77 | 70 | 92 | 122 | 159 | 207 |
| 78 | 71 | 94 | 124 | 161 | 210 |
| 79 | 72 | 95 | 126 | 163 | 213 |
| 80 | 73 | 96 | 127 | 166 | 216 |
| 81 | 74 | 98 | 129 | 168 | 219 |
| 82 | 75 | 99 | 131 | 170 | 222 |

Female  
 Formal  
 Education:  
 13 - 19  
 years

|    |    |    |    |     |     |
|----|----|----|----|-----|-----|
| 30 | 29 | 39 | 53 | 68  | 89  |
| 31 | 30 | 40 | 53 | 69  | 90  |
| 32 | 30 | 40 | 54 | 70  | 91  |
| 33 | 31 | 41 | 55 | 71  | 92  |
| 34 | 31 | 41 | 55 | 72  | 93  |
| 35 | 32 | 42 | 56 | 73  | 95  |
| 36 | 32 | 42 | 57 | 74  | 96  |
| 37 | 32 | 43 | 58 | 75  | 97  |
| 38 | 33 | 44 | 58 | 76  | 98  |
| 39 | 33 | 44 | 59 | 77  | 100 |
| 40 | 34 | 45 | 60 | 78  | 101 |
| 41 | 34 | 45 | 61 | 79  | 103 |
| 42 | 35 | 46 | 62 | 80  | 104 |
| 43 | 35 | 47 | 62 | 81  | 105 |
| 44 | 36 | 47 | 63 | 82  | 107 |
| 45 | 36 | 48 | 64 | 83  | 108 |
| 46 | 37 | 49 | 65 | 84  | 110 |
| 47 | 37 | 49 | 66 | 85  | 111 |
| 48 | 38 | 50 | 67 | 87  | 113 |
| 49 | 38 | 51 | 68 | 88  | 114 |
| 50 | 39 | 51 | 68 | 89  | 116 |
| 51 | 39 | 52 | 69 | 90  | 117 |
| 52 | 40 | 53 | 70 | 91  | 119 |
| 53 | 40 | 53 | 71 | 93  | 120 |
| 54 | 41 | 54 | 72 | 94  | 122 |
| 55 | 42 | 55 | 73 | 95  | 124 |
| 56 | 42 | 56 | 74 | 96  | 125 |
| 57 | 43 | 56 | 75 | 98  | 127 |
| 58 | 43 | 57 | 76 | 99  | 129 |
| 59 | 44 | 58 | 77 | 100 | 130 |
| 60 | 44 | 59 | 78 | 102 | 132 |
| 61 | 45 | 59 | 79 | 103 | 134 |
| 62 | 46 | 60 | 80 | 104 | 136 |
| 63 | 46 | 61 | 81 | 106 | 138 |
| 64 | 47 | 62 | 82 | 107 | 139 |
| 65 | 48 | 63 | 83 | 109 | 141 |
| 66 | 48 | 64 | 85 | 110 | 143 |
| 67 | 49 | 65 | 86 | 111 | 145 |
| 68 | 50 | 65 | 87 | 113 | 147 |
| 69 | 50 | 66 | 88 | 115 | 149 |
| 70 | 51 | 67 | 89 | 116 | 151 |
| 71 | 52 | 68 | 90 | 118 | 153 |
| 72 | 52 | 69 | 92 | 119 | 155 |
| 73 | 53 | 70 | 93 | 121 | 157 |
| 74 | 54 | 71 | 94 | 122 | 159 |
| 75 | 55 | 72 | 95 | 124 | 162 |

|    |    |    |     |     |     |
|----|----|----|-----|-----|-----|
| 76 | 55 | 73 | 97  | 126 | 164 |
| 77 | 56 | 74 | 98  | 127 | 166 |
| 78 | 57 | 75 | 99  | 129 | 168 |
| 79 | 58 | 76 | 101 | 131 | 170 |
| 80 | 58 | 77 | 102 | 133 | 173 |
| 81 | 59 | 78 | 103 | 134 | 175 |
| 82 | 60 | 79 | 105 | 136 | 177 |

LTT Time Norm PSE Danish Data 2021, by Age and Covariables

| Formal<br>Education | age | LTTTime:<br>mean -1<br>sd, by age | LTTTime:<br>mean by<br>age | LTTTime:<br>mean + 1<br>sd, by age | LTTTime:<br>mean + 2<br>sd, by age | LTTTime:<br>mean + 3<br>sd, by age |
|---------------------|-----|-----------------------------------|----------------------------|------------------------------------|------------------------------------|------------------------------------|
| Formal              |     |                                   |                            |                                    |                                    |                                    |
| Education:          |     |                                   |                            |                                    |                                    |                                    |
| 7-12 years          | 30  | 41                                | 57                         | 78                                 | 107                                | 145                                |
|                     | 31  | 42                                | 58                         | 79                                 | 107                                | 146                                |
|                     | 32  | 42                                | 58                         | 79                                 | 108                                | 147                                |
|                     | 33  | 42                                | 58                         | 80                                 | 109                                | 148                                |
|                     | 34  | 43                                | 59                         | 81                                 | 110                                | 149                                |
|                     | 35  | 43                                | 59                         | 81                                 | 110                                | 150                                |
|                     | 36  | 43                                | 60                         | 82                                 | 111                                | 151                                |
|                     | 37  | 44                                | 60                         | 82                                 | 112                                | 152                                |
|                     | 38  | 44                                | 60                         | 83                                 | 113                                | 154                                |
|                     | 39  | 44                                | 61                         | 83                                 | 114                                | 155                                |
|                     | 40  | 44                                | 61                         | 84                                 | 114                                | 156                                |
|                     | 41  | 45                                | 62                         | 85                                 | 115                                | 157                                |
|                     | 42  | 45                                | 62                         | 85                                 | 116                                | 158                                |
|                     | 43  | 45                                | 63                         | 86                                 | 117                                | 159                                |
|                     | 44  | 46                                | 63                         | 86                                 | 118                                | 160                                |
|                     | 45  | 46                                | 63                         | 87                                 | 118                                | 161                                |
|                     | 46  | 46                                | 64                         | 88                                 | 119                                | 162                                |
|                     | 47  | 47                                | 64                         | 88                                 | 120                                | 163                                |
|                     | 48  | 47                                | 65                         | 89                                 | 121                                | 165                                |
|                     | 49  | 47                                | 65                         | 89                                 | 122                                | 166                                |
|                     | 50  | 48                                | 66                         | 90                                 | 123                                | 167                                |
|                     | 51  | 48                                | 66                         | 91                                 | 123                                | 168                                |
|                     | 52  | 48                                | 67                         | 91                                 | 124                                | 169                                |
|                     | 53  | 49                                | 67                         | 92                                 | 125                                | 170                                |
|                     | 54  | 49                                | 68                         | 93                                 | 126                                | 172                                |
|                     | 55  | 49                                | 68                         | 93                                 | 127                                | 173                                |
|                     | 56  | 50                                | 68                         | 94                                 | 128                                | 174                                |
|                     | 57  | 50                                | 69                         | 95                                 | 129                                | 175                                |
|                     | 58  | 50                                | 69                         | 95                                 | 130                                | 176                                |
|                     | 59  | 51                                | 70                         | 96                                 | 130                                | 178                                |
|                     | 60  | 51                                | 70                         | 97                                 | 131                                | 179                                |
|                     | 61  | 52                                | 71                         | 97                                 | 132                                | 180                                |
|                     | 62  | 52                                | 71                         | 98                                 | 133                                | 181                                |
|                     | 63  | 52                                | 72                         | 99                                 | 134                                | 183                                |
|                     | 64  | 53                                | 72                         | 99                                 | 135                                | 184                                |
|                     | 65  | 53                                | 73                         | 100                                | 136                                | 185                                |
|                     | 66  | 53                                | 73                         | 101                                | 137                                | 187                                |
|                     | 67  | 54                                | 74                         | 101                                | 138                                | 188                                |
|                     | 68  | 54                                | 74                         | 102                                | 139                                | 189                                |
|                     | 69  | 55                                | 75                         | 103                                | 140                                | 190                                |
|                     | 70  | 55                                | 76                         | 103                                | 141                                | 192                                |
|                     | 71  | 55                                | 76                         | 104                                | 142                                | 193                                |
|                     | 72  | 56                                | 77                         | 105                                | 143                                | 194                                |
|                     | 73  | 56                                | 77                         | 106                                | 144                                | 196                                |



|    |    |    |     |     |     |
|----|----|----|-----|-----|-----|
| 74 | 56 | 78 | 106 | 145 | 197 |
| 75 | 57 | 78 | 107 | 146 | 199 |
| 76 | 57 | 79 | 108 | 147 | 200 |
| 77 | 58 | 79 | 109 | 148 | 201 |
| 78 | 58 | 80 | 109 | 149 | 203 |
| 79 | 58 | 80 | 110 | 150 | 204 |
| 80 | 59 | 81 | 111 | 151 | 206 |
| 81 | 59 | 82 | 112 | 152 | 207 |
| 82 | 60 | 82 | 112 | 153 | 208 |

Formal  
Education:  
13 - 19  
years

|    |    |    |    |     |     |
|----|----|----|----|-----|-----|
| 30 | 36 | 50 | 69 | 93  | 127 |
| 31 | 36 | 50 | 69 | 94  | 128 |
| 32 | 37 | 51 | 70 | 95  | 129 |
| 33 | 37 | 51 | 70 | 95  | 130 |
| 34 | 37 | 51 | 71 | 96  | 131 |
| 35 | 37 | 52 | 71 | 97  | 131 |
| 36 | 38 | 52 | 71 | 97  | 132 |
| 37 | 38 | 52 | 72 | 98  | 133 |
| 38 | 38 | 53 | 72 | 99  | 134 |
| 39 | 39 | 53 | 73 | 99  | 135 |
| 40 | 39 | 54 | 73 | 100 | 136 |
| 41 | 39 | 54 | 74 | 101 | 137 |
| 42 | 39 | 54 | 75 | 101 | 138 |
| 43 | 40 | 55 | 75 | 102 | 139 |
| 44 | 40 | 55 | 76 | 103 | 140 |
| 45 | 40 | 55 | 76 | 104 | 141 |
| 46 | 40 | 56 | 77 | 104 | 142 |
| 47 | 41 | 56 | 77 | 105 | 143 |
| 48 | 41 | 57 | 78 | 106 | 144 |
| 49 | 41 | 57 | 78 | 106 | 145 |
| 50 | 42 | 57 | 79 | 107 | 146 |
| 51 | 42 | 58 | 79 | 108 | 147 |
| 52 | 42 | 58 | 80 | 109 | 148 |
| 53 | 43 | 59 | 80 | 109 | 149 |
| 54 | 43 | 59 | 81 | 110 | 150 |
| 55 | 43 | 59 | 82 | 111 | 151 |
| 56 | 43 | 60 | 82 | 112 | 152 |
| 57 | 44 | 60 | 83 | 113 | 153 |
| 58 | 44 | 61 | 83 | 113 | 154 |
| 59 | 44 | 61 | 84 | 114 | 155 |
| 60 | 45 | 62 | 84 | 115 | 156 |
| 61 | 45 | 62 | 85 | 116 | 158 |
| 62 | 45 | 62 | 86 | 116 | 159 |
| 63 | 46 | 63 | 86 | 117 | 160 |
| 64 | 46 | 63 | 87 | 118 | 161 |
| 65 | 46 | 64 | 87 | 119 | 162 |
| 66 | 47 | 64 | 88 | 120 | 163 |
| 67 | 47 | 65 | 89 | 121 | 164 |
| 68 | 47 | 65 | 89 | 121 | 165 |
| 69 | 48 | 66 | 90 | 122 | 167 |
| 70 | 48 | 66 | 90 | 123 | 168 |
| 71 | 48 | 66 | 91 | 124 | 169 |
| 72 | 49 | 67 | 92 | 125 | 170 |
| 73 | 49 | 67 | 92 | 126 | 171 |
| 74 | 49 | 68 | 93 | 127 | 172 |
| 75 | 50 | 68 | 94 | 127 | 174 |
| 76 | 50 | 69 | 94 | 128 | 175 |
| 77 | 50 | 69 | 95 | 129 | 176 |
| 78 | 51 | 70 | 96 | 130 | 177 |
| 79 | 51 | 70 | 96 | 131 | 179 |
| 80 | 51 | 71 | 97 | 132 | 180 |
| 81 | 52 | 71 | 98 | 133 | 181 |
| 82 | 52 | 72 | 98 | 134 | 182 |

## LTT Error Norm PSE Danish Data 2021, by Age

| age | LTTError:<br>mean -1<br>sd, by age | LTTError:<br>mean by<br>age | LTTError:<br>mean + 1<br>sd, by age | LTTError:<br>mean + 2<br>sd, by age | LTTError:<br>mean + 3<br>sd, by age |
|-----|------------------------------------|-----------------------------|-------------------------------------|-------------------------------------|-------------------------------------|
| 30  | 6                                  | 20                          | 41                                  | 70                                  | 107                                 |
| 31  | 6                                  | 20                          | 42                                  | 71                                  | 108                                 |
| 32  | 6                                  | 20                          | 42                                  | 71                                  | 108                                 |
| 33  | 6                                  | 21                          | 43                                  | 72                                  | 109                                 |
| 34  | 6                                  | 21                          | 43                                  | 73                                  | 110                                 |
| 35  | 7                                  | 21                          | 44                                  | 73                                  | 111                                 |
| 36  | 7                                  | 22                          | 44                                  | 74                                  | 112                                 |
| 37  | 7                                  | 22                          | 45                                  | 75                                  | 113                                 |
| 38  | 7                                  | 22                          | 45                                  | 75                                  | 113                                 |
| 39  | 7                                  | 23                          | 46                                  | 76                                  | 114                                 |
| 40  | 8                                  | 23                          | 46                                  | 77                                  | 115                                 |
| 41  | 8                                  | 24                          | 47                                  | 78                                  | 116                                 |
| 42  | 8                                  | 24                          | 47                                  | 78                                  | 117                                 |
| 43  | 8                                  | 24                          | 48                                  | 79                                  | 117                                 |
| 44  | 9                                  | 25                          | 49                                  | 80                                  | 118                                 |
| 45  | 9                                  | 25                          | 49                                  | 80                                  | 119                                 |
| 46  | 9                                  | 25                          | 50                                  | 81                                  | 120                                 |
| 47  | 9                                  | 26                          | 50                                  | 82                                  | 121                                 |
| 48  | 9                                  | 26                          | 51                                  | 82                                  | 122                                 |
| 49  | 10                                 | 27                          | 51                                  | 83                                  | 123                                 |
| 50  | 10                                 | 27                          | 52                                  | 84                                  | 123                                 |
| 51  | 10                                 | 27                          | 52                                  | 84                                  | 124                                 |
| 52  | 10                                 | 28                          | 53                                  | 85                                  | 125                                 |
| 53  | 11                                 | 28                          | 53                                  | 86                                  | 126                                 |
| 54  | 11                                 | 29                          | 54                                  | 87                                  | 127                                 |
| 55  | 11                                 | 29                          | 55                                  | 87                                  | 128                                 |
| 56  | 12                                 | 30                          | 55                                  | 88                                  | 129                                 |
| 57  | 12                                 | 30                          | 56                                  | 89                                  | 130                                 |
| 58  | 12                                 | 30                          | 56                                  | 90                                  | 130                                 |
| 59  | 12                                 | 31                          | 57                                  | 90                                  | 131                                 |
| 60  | 13                                 | 31                          | 58                                  | 91                                  | 132                                 |
| 61  | 13                                 | 32                          | 58                                  | 92                                  | 133                                 |
| 62  | 13                                 | 32                          | 59                                  | 92                                  | 134                                 |
| 63  | 13                                 | 33                          | 59                                  | 93                                  | 135                                 |
| 64  | 14                                 | 33                          | 60                                  | 94                                  | 136                                 |
| 65  | 14                                 | 33                          | 60                                  | 95                                  | 137                                 |
| 66  | 14                                 | 34                          | 61                                  | 95                                  | 138                                 |
| 67  | 15                                 | 34                          | 62                                  | 96                                  | 139                                 |
| 68  | 15                                 | 35                          | 62                                  | 97                                  | 139                                 |
| 69  | 15                                 | 35                          | 63                                  | 98                                  | 140                                 |
| 70  | 16                                 | 36                          | 64                                  | 99                                  | 141                                 |
| 71  | 16                                 | 36                          | 64                                  | 99                                  | 142                                 |
| 72  | 16                                 | 37                          | 65                                  | 100                                 | 143                                 |
| 73  | 17                                 | 37                          | 65                                  | 101                                 | 144                                 |
| 74  | 17                                 | 38                          | 66                                  | 102                                 | 145                                 |
| 75  | 17                                 | 38                          | 67                                  | 102                                 | 146                                 |
| 76  | 18                                 | 39                          | 67                                  | 103                                 | 147                                 |
| 77  | 18                                 | 39                          | 68                                  | 104                                 | 148                                 |
| 78  | 18                                 | 40                          | 69                                  | 105                                 | 149                                 |
| 79  | 19                                 | 40                          | 69                                  | 106                                 | 150                                 |
| 80  | 19                                 | 40                          | 70                                  | 106                                 | 151                                 |
| 81  | 19                                 | 41                          | 70                                  | 107                                 | 152                                 |
| 82  | 20                                 | 41                          | 71                                  | 108                                 | 153                                 |

DST Norm PSE Danish Data 2021, by Age and Covariables

| Gender     | age | DST: mean<br>+ 1 sd, by<br>age | DST: mean<br>by age | DST: mean<br>- 1 sd,<br>by age | DST: mean<br>- 2 sd, by<br>age | DST: mean<br>-3 sd, by<br>age |
|------------|-----|--------------------------------|---------------------|--------------------------------|--------------------------------|-------------------------------|
| Male       |     |                                |                     |                                |                                |                               |
| Formal     |     |                                |                     |                                |                                |                               |
| Education: |     |                                |                     |                                |                                |                               |
| 7-12 years | 30  | 59                             | 50                  | 42                             | 35                             | 30                            |
|            | 31  | 59                             | 49                  | 41                             | 35                             | 29                            |
|            | 32  | 58                             | 49                  | 41                             | 35                             | 29                            |
|            | 33  | 58                             | 49                  | 41                             | 34                             | 29                            |
|            | 34  | 57                             | 48                  | 40                             | 34                             | 29                            |
|            | 35  | 57                             | 48                  | 40                             | 34                             | 28                            |
|            | 36  | 57                             | 47                  | 40                             | 33                             | 28                            |
|            | 37  | 56                             | 47                  | 39                             | 33                             | 28                            |
|            | 38  | 56                             | 47                  | 39                             | 33                             | 28                            |
|            | 39  | 55                             | 46                  | 39                             | 33                             | 28                            |
|            | 40  | 55                             | 46                  | 38                             | 32                             | 27                            |
|            | 41  | 54                             | 46                  | 38                             | 32                             | 27                            |
|            | 42  | 54                             | 45                  | 38                             | 32                             | 27                            |
|            | 43  | 54                             | 45                  | 38                             | 32                             | 27                            |
|            | 44  | 53                             | 45                  | 37                             | 31                             | 27                            |
|            | 45  | 53                             | 44                  | 37                             | 31                             | 26                            |
|            | 46  | 52                             | 44                  | 37                             | 31                             | 26                            |
|            | 47  | 52                             | 44                  | 36                             | 31                             | 26                            |
|            | 48  | 52                             | 43                  | 36                             | 30                             | 26                            |
|            | 49  | 51                             | 43                  | 36                             | 30                             | 25                            |
|            | 50  | 51                             | 43                  | 36                             | 30                             | 25                            |
|            | 51  | 50                             | 42                  | 35                             | 30                             | 25                            |
|            | 52  | 50                             | 42                  | 35                             | 30                             | 25                            |
|            | 53  | 50                             | 42                  | 35                             | 29                             | 25                            |
|            | 54  | 49                             | 41                  | 34                             | 29                             | 25                            |
|            | 55  | 49                             | 41                  | 34                             | 29                             | 24                            |
|            | 56  | 49                             | 41                  | 34                             | 29                             | 24                            |
|            | 57  | 48                             | 40                  | 34                             | 28                             | 24                            |
|            | 58  | 48                             | 40                  | 33                             | 28                             | 24                            |
|            | 59  | 47                             | 40                  | 33                             | 28                             | 24                            |
|            | 60  | 47                             | 39                  | 33                             | 28                             | 23                            |
|            | 61  | 47                             | 39                  | 33                             | 27                             | 23                            |
|            | 62  | 46                             | 39                  | 32                             | 27                             | 23                            |
|            | 63  | 46                             | 39                  | 32                             | 27                             | 23                            |
|            | 64  | 46                             | 38                  | 32                             | 27                             | 23                            |
|            | 65  | 45                             | 38                  | 32                             | 27                             | 22                            |
|            | 66  | 45                             | 38                  | 31                             | 26                             | 22                            |
|            | 67  | 45                             | 37                  | 31                             | 26                             | 22                            |
|            | 68  | 44                             | 37                  | 31                             | 26                             | 22                            |
|            | 69  | 44                             | 37                  | 31                             | 26                             | 22                            |
|            | 70  | 44                             | 36                  | 30                             | 26                             | 22                            |
|            | 71  | 43                             | 36                  | 30                             | 25                             | 21                            |
|            | 72  | 43                             | 36                  | 30                             | 25                             | 21                            |
|            | 73  | 43                             | 36                  | 30                             | 25                             | 21                            |
|            | 74  | 42                             | 35                  | 29                             | 25                             | 21                            |
|            | 75  | 42                             | 35                  | 29                             | 25                             | 21                            |
|            | 76  | 42                             | 35                  | 29                             | 24                             | 21                            |
|            | 77  | 41                             | 35                  | 29                             | 24                             | 20                            |
|            | 78  | 41                             | 34                  | 29                             | 24                             | 20                            |
|            | 79  | 41                             | 34                  | 28                             | 24                             | 20                            |
|            | 80  | 40                             | 34                  | 28                             | 24                             | 20                            |
|            | 81  | 40                             | 34                  | 28                             | 23                             | 20                            |

|            |    |    |    |    |    |    |
|------------|----|----|----|----|----|----|
|            | 82 | 40 | 33 | 28 | 23 | 20 |
| Male       |    |    |    |    |    |    |
| Formal     |    |    |    |    |    |    |
| Education: |    |    |    |    |    |    |
| 13 - 19    |    |    |    |    |    |    |
| years      | 30 | 68 | 57 | 48 | 40 | 34 |
|            | 31 | 67 | 57 | 47 | 40 | 34 |
|            | 32 | 67 | 56 | 47 | 40 | 33 |
|            | 33 | 66 | 56 | 47 | 39 | 33 |
|            | 34 | 66 | 55 | 46 | 39 | 33 |
|            | 35 | 65 | 55 | 46 | 39 | 33 |
|            | 36 | 65 | 54 | 46 | 38 | 32 |
|            | 37 | 64 | 54 | 45 | 38 | 32 |
|            | 38 | 64 | 54 | 45 | 38 | 32 |
|            | 39 | 63 | 53 | 44 | 38 | 32 |
|            | 40 | 63 | 53 | 44 | 37 | 31 |
|            | 41 | 62 | 52 | 44 | 37 | 31 |
|            | 42 | 62 | 52 | 43 | 37 | 31 |
|            | 43 | 61 | 52 | 43 | 36 | 31 |
|            | 44 | 61 | 51 | 43 | 36 | 30 |
|            | 45 | 60 | 51 | 42 | 36 | 30 |
|            | 46 | 60 | 50 | 42 | 36 | 30 |
|            | 47 | 60 | 50 | 42 | 35 | 30 |
|            | 48 | 59 | 50 | 41 | 35 | 30 |
|            | 49 | 59 | 49 | 41 | 35 | 29 |
|            | 50 | 58 | 49 | 41 | 34 | 29 |
|            | 51 | 58 | 48 | 40 | 34 | 29 |
|            | 52 | 57 | 48 | 40 | 34 | 29 |
|            | 53 | 57 | 48 | 40 | 34 | 28 |
|            | 54 | 56 | 47 | 40 | 33 | 28 |
|            | 55 | 56 | 47 | 39 | 33 | 28 |
|            | 56 | 56 | 47 | 39 | 33 | 28 |
|            | 57 | 55 | 46 | 39 | 33 | 27 |
|            | 58 | 55 | 46 | 38 | 32 | 27 |
|            | 59 | 54 | 46 | 38 | 32 | 27 |
|            | 60 | 54 | 45 | 38 | 32 | 27 |
|            | 61 | 54 | 45 | 37 | 32 | 27 |
|            | 62 | 53 | 45 | 37 | 31 | 26 |
|            | 63 | 53 | 44 | 37 | 31 | 26 |
|            | 64 | 52 | 44 | 37 | 31 | 26 |
|            | 65 | 52 | 43 | 36 | 31 | 26 |
|            | 66 | 52 | 43 | 36 | 30 | 26 |
|            | 67 | 51 | 43 | 36 | 30 | 25 |
|            | 68 | 51 | 42 | 35 | 30 | 25 |
|            | 69 | 50 | 42 | 35 | 30 | 25 |
|            | 70 | 50 | 42 | 35 | 29 | 25 |
|            | 71 | 50 | 42 | 35 | 29 | 25 |
|            | 72 | 49 | 41 | 34 | 29 | 24 |
|            | 73 | 49 | 41 | 34 | 29 | 24 |
|            | 74 | 48 | 41 | 34 | 29 | 24 |
|            | 75 | 48 | 40 | 34 | 28 | 24 |
|            | 76 | 48 | 40 | 33 | 28 | 24 |
|            | 77 | 47 | 40 | 33 | 28 | 23 |
|            | 78 | 47 | 39 | 33 | 28 | 23 |
|            | 79 | 47 | 39 | 33 | 27 | 23 |
|            | 80 | 46 | 39 | 32 | 27 | 23 |
|            | 81 | 46 | 38 | 32 | 27 | 23 |
|            | 82 | 46 | 38 | 32 | 27 | 23 |
| Female     |    |    |    |    |    |    |
| Formal     |    |    |    |    |    |    |
| Education: |    |    |    |    |    |    |
| 7-12 years | 30 | 67 | 56 | 47 | 40 | 34 |
|            | 31 | 66 | 56 | 47 | 39 | 33 |
|            | 32 | 66 | 55 | 46 | 39 | 33 |
|            | 33 | 65 | 55 | 46 | 39 | 33 |
|            | 34 | 65 | 55 | 46 | 39 | 33 |

|    |    |    |    |    |    |
|----|----|----|----|----|----|
| 35 | 64 | 54 | 45 | 38 | 32 |
| 36 | 64 | 54 | 45 | 38 | 32 |
| 37 | 63 | 53 | 45 | 38 | 32 |
| 38 | 63 | 53 | 44 | 37 | 32 |
| 39 | 63 | 52 | 44 | 37 | 31 |
| 40 | 62 | 52 | 44 | 37 | 31 |
| 41 | 62 | 52 | 43 | 36 | 31 |
| 42 | 61 | 51 | 43 | 36 | 31 |
| 43 | 61 | 51 | 43 | 36 | 30 |
| 44 | 60 | 50 | 42 | 36 | 30 |
| 45 | 60 | 50 | 42 | 35 | 30 |
| 46 | 59 | 50 | 42 | 35 | 30 |
| 47 | 59 | 49 | 41 | 35 | 29 |
| 48 | 58 | 49 | 41 | 35 | 29 |
| 49 | 58 | 49 | 41 | 34 | 29 |
| 50 | 57 | 48 | 40 | 34 | 29 |
| 51 | 57 | 48 | 40 | 34 | 28 |
| 52 | 57 | 47 | 40 | 33 | 28 |
| 53 | 56 | 47 | 39 | 33 | 28 |
| 54 | 56 | 47 | 39 | 33 | 28 |
| 55 | 55 | 46 | 39 | 33 | 28 |
| 56 | 55 | 46 | 38 | 32 | 27 |
| 57 | 54 | 46 | 38 | 32 | 27 |
| 58 | 54 | 45 | 38 | 32 | 27 |
| 59 | 54 | 45 | 38 | 32 | 27 |
| 60 | 53 | 45 | 37 | 31 | 27 |
| 61 | 53 | 44 | 37 | 31 | 26 |
| 62 | 52 | 44 | 37 | 31 | 26 |
| 63 | 52 | 44 | 36 | 31 | 26 |
| 64 | 52 | 43 | 36 | 30 | 26 |
| 65 | 51 | 43 | 36 | 30 | 25 |
| 66 | 51 | 43 | 36 | 30 | 25 |
| 67 | 50 | 42 | 35 | 30 | 25 |
| 68 | 50 | 42 | 35 | 30 | 25 |
| 69 | 50 | 42 | 35 | 29 | 25 |
| 70 | 49 | 41 | 34 | 29 | 24 |
| 71 | 49 | 41 | 34 | 29 | 24 |
| 72 | 49 | 41 | 34 | 29 | 24 |
| 73 | 48 | 40 | 34 | 28 | 24 |
| 74 | 48 | 40 | 33 | 28 | 24 |
| 75 | 47 | 40 | 33 | 28 | 24 |
| 76 | 47 | 39 | 33 | 28 | 23 |
| 77 | 47 | 39 | 33 | 27 | 23 |
| 78 | 46 | 39 | 32 | 27 | 23 |
| 79 | 46 | 39 | 32 | 27 | 23 |
| 80 | 46 | 38 | 32 | 27 | 23 |
| 81 | 45 | 38 | 32 | 27 | 22 |
| 82 | 45 | 38 | 31 | 26 | 22 |

Female  
Formal  
Education:  
13 - 19  
years

|    |    |    |    |    |    |
|----|----|----|----|----|----|
| 30 | 77 | 64 | 54 | 46 | 39 |
| 31 | 76 | 64 | 54 | 45 | 38 |
| 32 | 76 | 63 | 53 | 45 | 38 |
| 33 | 75 | 63 | 53 | 45 | 38 |
| 34 | 74 | 63 | 52 | 44 | 37 |
| 35 | 74 | 62 | 52 | 44 | 37 |
| 36 | 73 | 62 | 52 | 44 | 37 |
| 37 | 73 | 61 | 51 | 43 | 36 |
| 38 | 72 | 61 | 51 | 43 | 36 |
| 39 | 72 | 60 | 50 | 43 | 36 |
| 40 | 71 | 60 | 50 | 42 | 36 |
| 41 | 71 | 59 | 50 | 42 | 35 |
| 42 | 70 | 59 | 49 | 42 | 35 |
| 43 | 69 | 58 | 49 | 41 | 35 |
| 44 | 69 | 58 | 48 | 41 | 35 |

|    |    |    |    |    |    |
|----|----|----|----|----|----|
| 45 | 68 | 57 | 48 | 41 | 34 |
| 46 | 68 | 57 | 48 | 40 | 34 |
| 47 | 67 | 57 | 47 | 40 | 34 |
| 48 | 67 | 56 | 47 | 40 | 33 |
| 49 | 66 | 56 | 47 | 39 | 33 |
| 50 | 66 | 55 | 46 | 39 | 33 |
| 51 | 65 | 55 | 46 | 39 | 33 |
| 52 | 65 | 54 | 46 | 38 | 32 |
| 53 | 64 | 54 | 45 | 38 | 32 |
| 54 | 64 | 54 | 45 | 38 | 32 |
| 55 | 63 | 53 | 44 | 38 | 32 |
| 56 | 63 | 53 | 44 | 37 | 31 |
| 57 | 62 | 52 | 44 | 37 | 31 |
| 58 | 62 | 52 | 43 | 37 | 31 |
| 59 | 61 | 52 | 43 | 36 | 31 |
| 60 | 61 | 51 | 43 | 36 | 30 |
| 61 | 60 | 51 | 42 | 36 | 30 |
| 62 | 60 | 50 | 42 | 36 | 30 |
| 63 | 60 | 50 | 42 | 35 | 30 |
| 64 | 59 | 50 | 41 | 35 | 30 |
| 65 | 59 | 49 | 41 | 35 | 29 |
| 66 | 58 | 49 | 41 | 34 | 29 |
| 67 | 58 | 48 | 40 | 34 | 29 |
| 68 | 57 | 48 | 40 | 34 | 29 |
| 69 | 57 | 48 | 40 | 34 | 28 |
| 70 | 56 | 47 | 40 | 33 | 28 |
| 71 | 56 | 47 | 39 | 33 | 28 |
| 72 | 56 | 47 | 39 | 33 | 28 |
| 73 | 55 | 46 | 39 | 33 | 27 |
| 74 | 55 | 46 | 38 | 32 | 27 |
| 75 | 54 | 46 | 38 | 32 | 27 |
| 76 | 54 | 45 | 38 | 32 | 27 |
| 77 | 53 | 45 | 37 | 32 | 27 |
| 78 | 53 | 44 | 37 | 31 | 26 |
| 79 | 53 | 44 | 37 | 31 | 26 |
| 80 | 52 | 44 | 37 | 31 | 26 |
| 81 | 52 | 43 | 36 | 31 | 26 |
| 82 | 51 | 43 | 36 | 30 | 26 |

SDOT Norm PSE Danish Data 2021, by Age and Covariables

| Formal Education | age | SDOT: mean<br>-1 sd, by<br>age | SDOT: mean<br>by age | SDOT: mean<br>+ 1 sd, by<br>age | SDOT: mean<br>+ 2 sd,<br>by age | SDOT: mean<br>+ 3 sd, by<br>age |
|------------------|-----|--------------------------------|----------------------|---------------------------------|---------------------------------|---------------------------------|
| 7 - 9 years      | 30  | 32                             | 40                   | 49                              | 61                              | 76                              |
|                  | 31  | 33                             | 40                   | 50                              | 61                              | 77                              |
|                  | 32  | 33                             | 40                   | 50                              | 62                              | 77                              |
|                  | 33  | 33                             | 41                   | 50                              | 62                              | 78                              |
|                  | 34  | 33                             | 41                   | 51                              | 63                              | 78                              |
|                  | 35  | 33                             | 41                   | 51                              | 63                              | 79                              |
|                  | 36  | 34                             | 42                   | 51                              | 64                              | 80                              |
|                  | 37  | 34                             | 42                   | 52                              | 64                              | 80                              |
|                  | 38  | 34                             | 42                   | 52                              | 65                              | 81                              |
|                  | 39  | 34                             | 42                   | 52                              | 65                              | 82                              |
|                  | 40  | 35                             | 43                   | 53                              | 66                              | 82                              |
|                  | 41  | 35                             | 43                   | 53                              | 66                              | 83                              |
|                  | 42  | 35                             | 43                   | 54                              | 67                              | 84                              |
|                  | 43  | 35                             | 44                   | 54                              | 67                              | 84                              |

|    |    |    |    |    |     |
|----|----|----|----|----|-----|
| 44 | 36 | 44 | 54 | 68 | 85  |
| 45 | 36 | 44 | 55 | 68 | 86  |
| 46 | 36 | 44 | 55 | 69 | 86  |
| 47 | 36 | 45 | 56 | 69 | 87  |
| 48 | 36 | 45 | 56 | 70 | 88  |
| 49 | 37 | 45 | 56 | 70 | 88  |
| 50 | 37 | 46 | 57 | 71 | 89  |
| 51 | 37 | 46 | 57 | 71 | 90  |
| 52 | 37 | 46 | 58 | 72 | 91  |
| 53 | 38 | 47 | 58 | 72 | 91  |
| 54 | 38 | 47 | 59 | 73 | 92  |
| 55 | 38 | 47 | 59 | 74 | 93  |
| 56 | 39 | 48 | 59 | 74 | 94  |
| 57 | 39 | 48 | 60 | 75 | 94  |
| 58 | 39 | 48 | 60 | 75 | 95  |
| 59 | 39 | 49 | 61 | 76 | 96  |
| 60 | 40 | 49 | 61 | 76 | 97  |
| 61 | 40 | 49 | 62 | 77 | 98  |
| 62 | 40 | 50 | 62 | 78 | 98  |
| 63 | 40 | 50 | 63 | 78 | 99  |
| 64 | 41 | 50 | 63 | 79 | 100 |
| 65 | 41 | 51 | 63 | 80 | 101 |
| 66 | 41 | 51 | 64 | 80 | 102 |
| 67 | 42 | 52 | 64 | 81 | 103 |
| 68 | 42 | 52 | 65 | 81 | 103 |
| 69 | 42 | 52 | 65 | 82 | 104 |
| 70 | 42 | 53 | 66 | 83 | 105 |
| 71 | 43 | 53 | 66 | 83 | 106 |
| 72 | 43 | 53 | 67 | 84 | 107 |
| 73 | 43 | 54 | 67 | 85 | 108 |
| 74 | 44 | 54 | 68 | 85 | 109 |
| 75 | 44 | 55 | 68 | 86 | 110 |
| 76 | 44 | 55 | 69 | 87 | 111 |
| 77 | 44 | 55 | 70 | 88 | 112 |
| 78 | 45 | 56 | 70 | 88 | 113 |
| 79 | 45 | 56 | 71 | 89 | 114 |
| 80 | 45 | 57 | 71 | 90 | 115 |
| 81 | 46 | 57 | 72 | 90 | 115 |
| 82 | 46 | 57 | 72 | 91 | 116 |

10 - 12  
years

|    |    |    |    |    |    |
|----|----|----|----|----|----|
| 30 | 28 | 34 | 42 | 52 | 64 |
| 31 | 28 | 35 | 43 | 52 | 64 |
| 32 | 28 | 35 | 43 | 52 | 65 |
| 33 | 29 | 35 | 43 | 53 | 65 |
| 34 | 29 | 35 | 43 | 53 | 66 |
| 35 | 29 | 36 | 44 | 54 | 66 |
| 36 | 29 | 36 | 44 | 54 | 67 |
| 37 | 29 | 36 | 44 | 54 | 67 |
| 38 | 30 | 36 | 45 | 55 | 68 |
| 39 | 30 | 36 | 45 | 55 | 68 |
| 40 | 30 | 37 | 45 | 56 | 69 |
| 41 | 30 | 37 | 46 | 56 | 70 |
| 42 | 30 | 37 | 46 | 56 | 70 |
| 43 | 31 | 37 | 46 | 57 | 71 |
| 44 | 31 | 38 | 46 | 57 | 71 |
| 45 | 31 | 38 | 47 | 58 | 72 |
| 46 | 31 | 38 | 47 | 58 | 72 |
| 47 | 31 | 38 | 47 | 58 | 73 |
| 48 | 32 | 39 | 48 | 59 | 73 |
| 49 | 32 | 39 | 48 | 59 | 74 |
| 50 | 32 | 39 | 48 | 60 | 75 |
| 51 | 32 | 39 | 49 | 60 | 75 |
| 52 | 32 | 40 | 49 | 61 | 76 |
| 53 | 33 | 40 | 49 | 61 | 76 |
| 54 | 33 | 40 | 50 | 62 | 77 |
| 55 | 33 | 41 | 50 | 62 | 78 |
| 56 | 33 | 41 | 51 | 62 | 78 |

|    |    |    |    |    |    |
|----|----|----|----|----|----|
| 57 | 33 | 41 | 51 | 63 | 79 |
| 58 | 34 | 41 | 51 | 63 | 79 |
| 59 | 34 | 42 | 52 | 64 | 80 |
| 60 | 34 | 42 | 52 | 64 | 81 |
| 61 | 34 | 42 | 52 | 65 | 81 |
| 62 | 35 | 43 | 53 | 65 | 82 |
| 63 | 35 | 43 | 53 | 66 | 83 |
| 64 | 35 | 43 | 53 | 66 | 83 |
| 65 | 35 | 43 | 54 | 67 | 84 |
| 66 | 35 | 44 | 54 | 67 | 85 |
| 67 | 36 | 44 | 55 | 68 | 85 |
| 68 | 36 | 44 | 55 | 68 | 86 |
| 69 | 36 | 45 | 55 | 69 | 87 |
| 70 | 36 | 45 | 56 | 69 | 87 |
| 71 | 37 | 45 | 56 | 70 | 88 |
| 72 | 37 | 46 | 57 | 70 | 89 |
| 73 | 37 | 46 | 57 | 71 | 90 |
| 74 | 37 | 46 | 57 | 72 | 90 |
| 75 | 38 | 47 | 58 | 72 | 91 |
| 76 | 38 | 47 | 58 | 73 | 92 |
| 77 | 38 | 47 | 59 | 73 | 93 |
| 78 | 38 | 48 | 59 | 74 | 93 |
| 79 | 39 | 48 | 60 | 74 | 94 |
| 80 | 39 | 48 | 60 | 75 | 95 |
| 81 | 39 | 49 | 61 | 76 | 96 |
| 82 | 39 | 49 | 61 | 76 | 96 |

13 - 19  
years

|    |    |    |    |    |    |
|----|----|----|----|----|----|
| 30 | 27 | 33 | 40 | 49 | 61 |
| 31 | 27 | 33 | 41 | 50 | 61 |
| 32 | 27 | 33 | 41 | 50 | 62 |
| 33 | 27 | 33 | 41 | 50 | 62 |
| 34 | 28 | 34 | 41 | 51 | 63 |
| 35 | 28 | 34 | 42 | 51 | 63 |
| 36 | 28 | 34 | 42 | 51 | 63 |
| 37 | 28 | 34 | 42 | 52 | 64 |
| 38 | 28 | 35 | 42 | 52 | 64 |
| 39 | 28 | 35 | 43 | 52 | 65 |
| 40 | 29 | 35 | 43 | 53 | 65 |
| 41 | 29 | 35 | 43 | 53 | 66 |
| 42 | 29 | 35 | 44 | 54 | 66 |
| 43 | 29 | 36 | 44 | 54 | 67 |
| 44 | 29 | 36 | 44 | 54 | 67 |
| 45 | 30 | 36 | 45 | 55 | 68 |
| 46 | 30 | 36 | 45 | 55 | 68 |
| 47 | 30 | 37 | 45 | 55 | 69 |
| 48 | 30 | 37 | 45 | 56 | 69 |
| 49 | 30 | 37 | 46 | 56 | 70 |
| 50 | 31 | 37 | 46 | 57 | 71 |
| 51 | 31 | 38 | 46 | 57 | 71 |
| 52 | 31 | 38 | 47 | 58 | 72 |
| 53 | 31 | 38 | 47 | 58 | 72 |
| 54 | 31 | 38 | 47 | 58 | 73 |
| 55 | 31 | 39 | 48 | 59 | 73 |
| 56 | 32 | 39 | 48 | 59 | 74 |
| 57 | 32 | 39 | 48 | 60 | 74 |
| 58 | 32 | 39 | 49 | 60 | 75 |
| 59 | 32 | 40 | 49 | 61 | 76 |
| 60 | 33 | 40 | 49 | 61 | 76 |
| 61 | 33 | 40 | 50 | 61 | 77 |
| 62 | 33 | 41 | 50 | 62 | 77 |
| 63 | 33 | 41 | 50 | 62 | 78 |
| 64 | 33 | 41 | 51 | 63 | 79 |
| 65 | 34 | 41 | 51 | 63 | 79 |
| 66 | 34 | 42 | 52 | 64 | 80 |
| 67 | 34 | 42 | 52 | 64 | 81 |
| 68 | 34 | 42 | 52 | 65 | 81 |
| 69 | 34 | 42 | 53 | 65 | 82 |



|    |    |    |    |    |    |
|----|----|----|----|----|----|
| 70 | 35 | 43 | 53 | 66 | 83 |
| 71 | 35 | 43 | 53 | 66 | 83 |
| 72 | 35 | 43 | 54 | 67 | 84 |
| 73 | 35 | 44 | 54 | 67 | 85 |
| 74 | 36 | 44 | 55 | 68 | 85 |
| 75 | 36 | 44 | 55 | 68 | 86 |
| 76 | 36 | 45 | 55 | 69 | 87 |
| 77 | 36 | 45 | 56 | 69 | 87 |
| 78 | 37 | 45 | 56 | 70 | 88 |
| 79 | 37 | 46 | 57 | 70 | 89 |
| 80 | 37 | 46 | 57 | 71 | 89 |
| 81 | 37 | 46 | 57 | 72 | 90 |
| 82 | 38 | 46 | 58 | 72 | 91 |
